# Supplementary material
Source: PubMed Central journal article supplement (PMC8092510)
Supplement: AAC.02028-20-s0001.pdf [file AAC.02028-20-s0001.pdf]

**The polyaminoisoprenyl potentiator NV716 revives old disused antibiotics against intracellular forms of infection by *Pseudomonas aeruginosa***

Gang W. Wang<sup>1</sup>, Jean-Michel Brunel<sup>2</sup>, Jean-Michel Bolla<sup>2</sup>, Françoise Van Bambeke<sup>1</sup>

<sup>1</sup> Pharmacologie cellulaire et moléculaire, Louvain Drug Research Institute, Université catholique de Louvain, Brussels, Belgium

<sup>2</sup> Aix Marseille Univ, INSERM, SSA, MCT, 13385 Marseille, France.

**Supplementary Materials**

**Table S1. Relevant properties of the antibiotics used in this study**

| Antibiotics     | Efflux pumps shown to increase the antibiotic MIC in <i>Pseudomonas aeruginosa</i> (1-3) | Apparent cellular accumulation in eukaryotic cells (at equilibrium) (4) <sup>a</sup> | Human serum C <sub>min</sub> (mg/L) (5, 6) | Human serum C <sub>max</sub> (mg/L) (6, 7) |
|-----------------|------------------------------------------------------------------------------------------|--------------------------------------------------------------------------------------|--------------------------------------------|--------------------------------------------|
| Ciprofloxacin   | MexAB-OprM, MexCD-OprJ, MexEF-OprN, MexXY-OprM                                           | 5                                                                                    | 0.05                                       | 5                                          |
| Doxycycline     | MexAB-OprM, MexCD-OprJ, MexXY-OprM                                                       | 2-10                                                                                 | 1                                          | 10                                         |
| Chloramphenicol | MexAB-OprM, MexCD-OprJ, MexEF-OprN                                                       | 2-5                                                                                  | 5                                          | 20                                         |
| Rifampin        | Poor substrate for these four efflux pumps                                               | 1-4                                                                                  | 0.5                                        | 20                                         |

<sup>a</sup> apparent accumulation factor ( $C_c/C_E$ : ratio between ( $C_c$ ) cellular concentration and ( $C_E$ ) extracellular concentration).

**Table S2. IC<sub>50</sub> values from cytotoxicity tests, for antibiotics alone or combined with potentiators, and expressed in different units (x MIC, mg/L,  $\mu$ M)**

| Antibiotic | units   | THP-1 non-infected |                           |                    |                     | THP-1 infected by PAO1 |                           |                     |                     |
|------------|---------|--------------------|---------------------------|--------------------|---------------------|------------------------|---------------------------|---------------------|---------------------|
|            |         | AB alone           | +PA $\beta$ N<br>(20mg/L) | +731 (10 $\mu$ M)  | +716 (10 $\mu$ M)   | AB alone               | +PA $\beta$ N<br>(20mg/L) | +731 (10 $\mu$ M)   | +716 (10 $\mu$ M)   |
| RIF        | x MIC   | 24.6 $\pm$ 1.1     | 27.3 $\pm$ 3.3            | 23.1 $\pm$ 2.6     | 22.0 $\pm$ 0.9      | 27.8 $\pm$ 1.9         | 26.6 $\pm$ 0.2            | 31.9 $\pm$ 2.9      | 28.7 $\pm$ 3.4      |
|            | mg/L    | 393.0 $\pm$ 18.3   | 436.1 $\pm$ 52.6          | 369.3 $\pm$ 41.5   | 351.6 $\pm$ 14.2    | 445.5 $\pm$ 30.2       | 426.2 $\pm$ 2.8           | 510.0 $\pm$ 47.1    | 459.0 $\pm$ 55.1    |
|            | $\mu$ M | 477.5 $\pm$ 22.3   | 529.9 $\pm$ 63.9          | 448.8 $\pm$ 50.5   | 427.2 $\pm$ 17.3    | 541.4 $\pm$ 36.7       | 517.9 $\pm$ 3.4           | 619.7 $\pm$ 57.3    | 557.8 $\pm$ 66.9    |
| DOX        | x MIC   | 41.9 $\pm$ 2.8     | 41.6 $\pm$ 3.7            | 38.5 $\pm$ 8.7     | 32.1 $\pm$ 2.5      | 56.7 $\pm$ 17.7        | 53.8 $\pm$ 17.9           | 51.2 $\pm$ 16.4     | 46.0 $\pm$ 4.2      |
|            | mg/L    | 334.8 $\pm$ 22.6   | 333.0 $\pm$ 29.3          | 307.9 $\pm$ 69.3   | 256.7 $\pm$ 19.9    | 453.7 $\pm$ 141.7      | 430.5 $\pm$ 143.4         | 409.8 $\pm$ 131.0   | 368.0 $\pm$ 34.0    |
|            | $\mu$ M | 753.4 $\pm$ 50.8   | 749.3 $\pm$ 65.9          | 692.9 $\pm$ 155.9  | 577.6 $\pm$ 44.9    | 1,020.8 $\pm$ 318.8    | 968.6 $\pm$ 322.6         | 922.2 $\pm$ 294.8   | 828.0 $\pm$ 76.4    |
| CHL        | x MIC   | 22.5 $\pm$ 0.8     | 21.0 $\pm$ 0.8            | 20.1 $\pm$ 0.5     | 19.5 $\pm$ 4.7      | 22.3 $\pm$ 2.5         | 20.2 $\pm$ 3.0            | 23.5 $\pm$ 3.1      | 22.1 $\pm$ 3.7      |
|            | mg/L    | 719.1 $\pm$ 25.3   | 673.2 $\pm$ 27.0          | 642.0 $\pm$ 16.2   | 624.4 $\pm$ 150.2   | 714.1 $\pm$ 80.4       | 645.9 $\pm$ 95.0          | 752.6 $\pm$ 98.4    | 707.0 $\pm$ 118.6   |
|            | $\mu$ M | 2,225.6 $\pm$ 78.4 | 2,083.3 $\pm$ 83.7        | 1,986.9 $\pm$ 50.1 | 1,932.4 $\pm$ 464.8 | 2,210.0 $\pm$ 248.8    | 1,998.8 $\pm$ 294.1       | 2,329.2 $\pm$ 304.4 | 2,187.9 $\pm$ 366.9 |

**Figure S1: Chemical structures of the potentiators used in this study.** The aminated functions that are partially protonated at physiological pH are evidenced by blue squares.

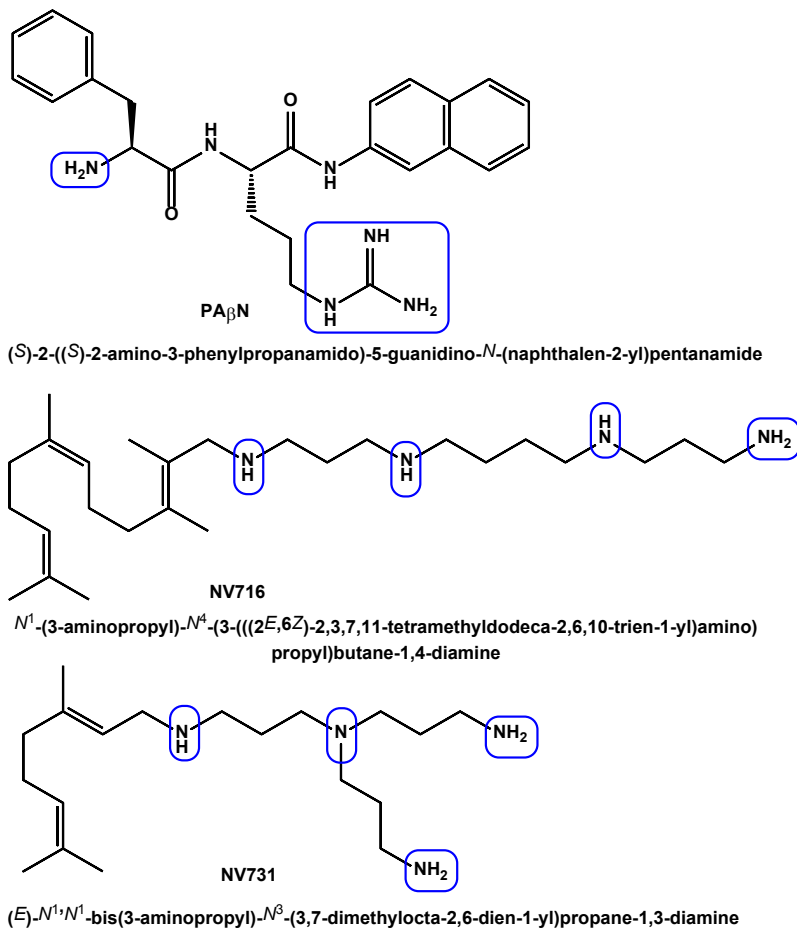

**Figure S2. Cytotoxicity of antibiotics alone or combined with potentiators, as assessed by the trypan blue exclusion test.** The graphs show the  $IC_{50}$  for three antibiotics (doxycycline [DOX], chloramphenicol [CHL] or rifampin [RIF] alone or combined potentiators at the indicated concentrations, calculated based on the Hill equation of concentration-response curves experiments similar to those illustrated in Figure 1, in non-infected THP-1 cells (left) or infected THP-1 cells (right). These  $IC_{50}$  values are higher than 400 mg/L in all cases, i.e. similar to the highest concentration tested in our model. The same type of experiment was performed with ciprofloxacin, but 50% cytotoxicity was not reached over the range of concentrations investigated (up to 25 mg/L), so that the  $IC_{50}$  could not be calculated. The dotted horizontal dotted lines in the left panel show the  $IC_{50}$  of potentiators alone (blue: NV731 [ $IC_{50}$ : 354  $\mu$ M or 115 mg/L]; red: NV716 [ $IC_{50}$ : 75  $\mu$ M or 32 mg/L]). These values are above the concentration used in most experiments (10  $\mu$ M). All data are shown as means  $\pm$  SEM (triplicates from 3 experiments). Statistical analysis (1-way ANOVA; Tukey's Multiple Comparison Test): no significant difference was noticed when comparing the different conditions for each antibiotic ( $p > 0.05$ ). See further details in Table S2.

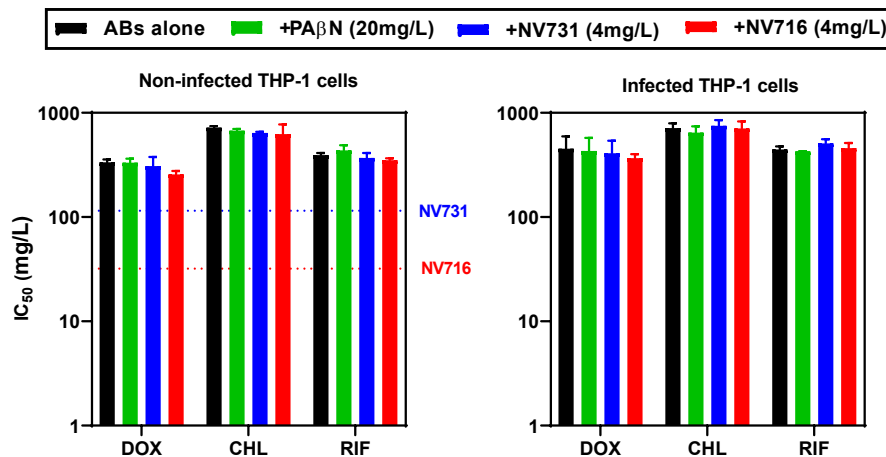

**Figure S3. Kill curve of extracellular PAO1 by NV716 at increasing concentrations.** The graph shows the changes in the Log<sub>10</sub> CFU counts from the initial inoculum per mL of broth over 8 h of incubation with NV716 at the indicated concentrations (expressed in μM). All data are means ± SEM (n=3).

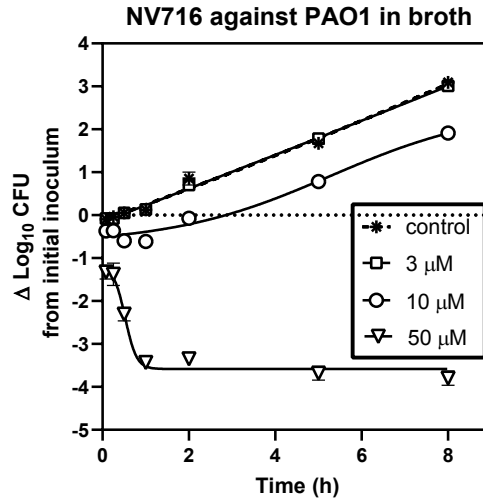

Corresponding method: PAO1 was incubated on TSA overnight. A single colony was inoculated in 10 mL MHB-CA and incubated overnight at 37°C with gentle agitation (130 rpm). The density of the culture was adjusted at 0.5 McF (around 10<sup>8</sup> CFU/mL) in PBS, and diluted 100 times in MHB-CA to obtain a starting inoculum of 10<sup>6</sup> CFU/mL. Concentration-kill curves were determined over time with NV716 concentrations ranging from 3 to 50 μM. Fifty μL aliquots were diluted and plated on agar containing 2g/L charcoal to adsorb the residual antibiotic.

## References

1. **Schweizer HP.** 2003. Efflux as a mechanism of resistance to antimicrobials in *Pseudomonas aeruginosa* and related bacteria: unanswered questions. *Genet Mol Res* **2**:48-62.
2. **Depardieu F, Podglajen I, Leclercq R, Collatz E, Courvalin P.** 2007. Modes and modulations of antibiotic resistance gene expression. *Clin Microbiol Rev* **20**:79-114.
3. **Lyu Y, Yang X, Goswami S, Gorityala BK, Idowu T.** 2017. Amphiphilic Tobramycin-Lysine Conjugates Sensitize Multidrug Resistant Gram-Negative Bacteria to Rifampicin and Minocycline. **60**:3684-3702.
4. **Carryn S, Chanteux H, Seral C, Mingeot-Leclercq MP, Van Bambeke F, Tulkens PM.** 2003. Intracellular pharmacodynamics of antibiotics. *Infect Dis Clin North Am* **17**:615-634.
5. **Pea F, Poz D, Viale P, Pavan F, Furlanut M.** 2006. Which reliable pharmacodynamic breakpoint should be advised for ciprofloxacin monotherapy in the hospital setting? A TDM-based retrospective perspective. *J Antimicrob Chemother* **58**:380-386.
6. **Schulz M, Iwersen-Bergmann S, Andresen H, Schmoldt A.** 2012. Therapeutic and toxic blood concentrations of nearly 1,000 drugs and other xenobiotics. *Crit Care* **16**:R136.
7. **Ruslami R, Nijland HM, Alisjahbana B, Parwati I, van Crevel R, Aarnoutse RE.** 2007. Pharmacokinetics and tolerability of a higher rifampin dose versus the standard dose in pulmonary tuberculosis patients. *Antimicrob Agents Chemother* **51**:2546-2551.
